# Supplementary material for: MicroRNA-6084 orchestrates angiogenesis and liver metastasis in colorectal cancer via extracellular vesicles
Source: JCI journal article supplement (doi:10.1172/jci.insight.189503), 2025-06-10
Supplement: sd1 [file 1]

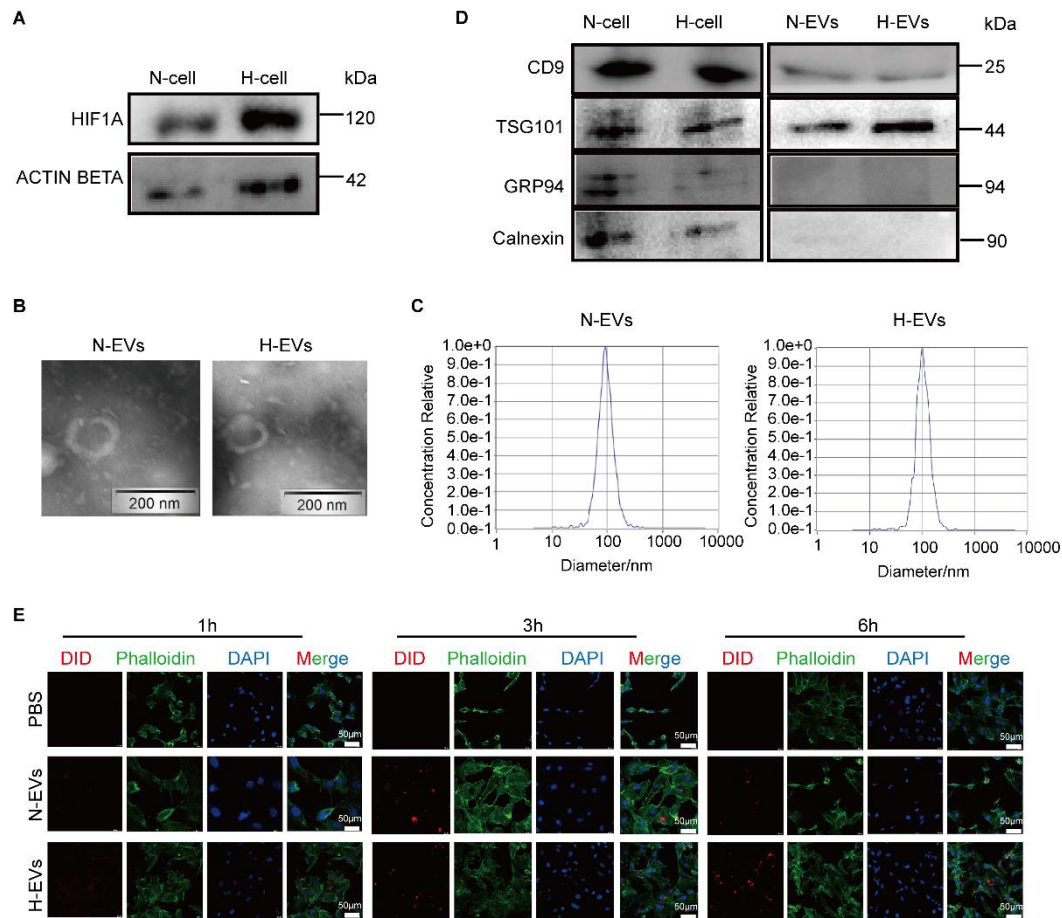

**Supplementary Figure 1. The characterization of SW620-derived EVs.** **A.** The expression of HIF1A in SW620 cells under normoxic (N-cell) and hypoxic (H-cell) conditions. **B.** Transmission electron microscope (TEM) images of EVs. **C.** The representative nanoparticle tracking analysis (NTA) of EVs. **D.** The EV positive (CD9 and TSG101) and negative (GRP94, Calnexin) markers were analyzed by western blot. **E.** Uptake of EVs derived from normoxic SW620 or hypoxic SW620 by HUVECs at 1 h, 3 h, 6 h. Fluorescence microscopy images showing the internalization of EVs by HUVECs. Blue: Nucleus stained with DAPI. Red: DID-labeled EVs. Green: CoraLite®488 Phalloidin. Scale bar, 20µm. N-EVs: EVs isolated from SW620 under normoxia. H-EVs: EVs isolated from SW620 under hypoxia.

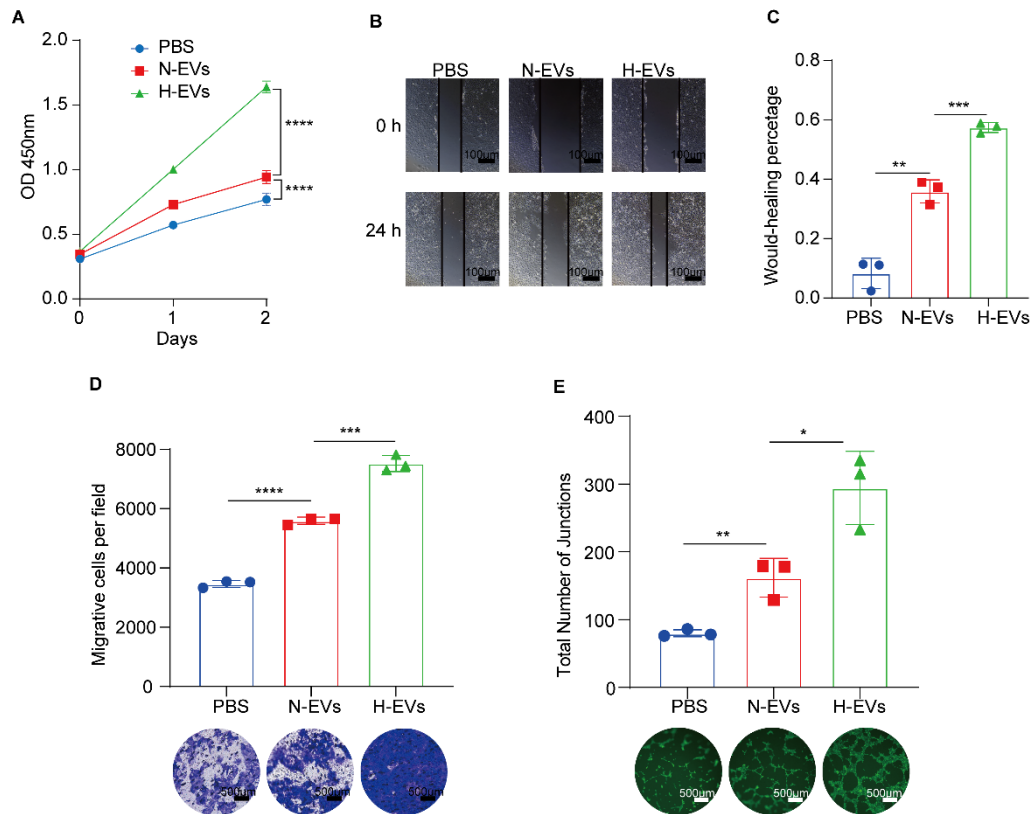

**Supplementary Figure 2. The impact of PBS, HCT116 derived normoxic EVs (N-EVs), and hypoxic EVs (H-EVs) in the proliferation, migration, tube formation of HUVECs.** **A.** The proliferation ability of HUVECs treated with PBS, N-EVs, and H-EVs were analyzed by CCK8 assay. The migration ability was assessed by wound healing assay (**B**) and transwell assay (**D**). The relative migration distance (%) was calculated (**C**). The number of migrative cells was counted and graphed (**D**). Representative pictures of tube formation were taken after stained with Calcein-AM and quantified by measuring the total vessel length (**E**). Statistical significance was assessed with 1-way ANOVA with Tukey's multiple-comparison test (**A, C-E**), \*  $P < 0.05$ , \*\*  $P < 0.01$ , \*\*\*  $P < 0.001$ , \*\*\*\*  $P < 0.0001$ .

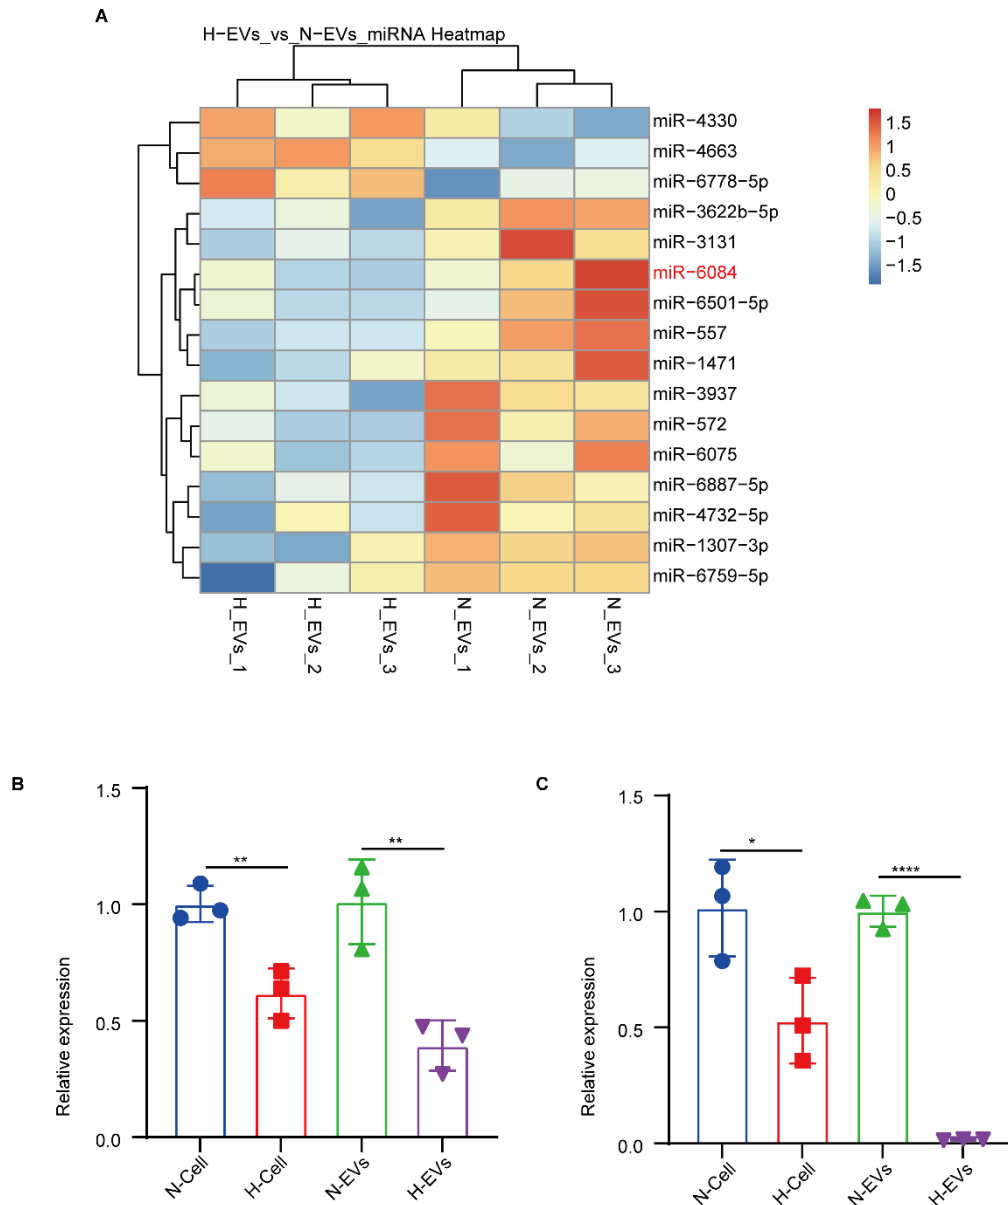

**Supplementary Figure 3. Selection of differentially expressed miRNAs between normoxic and hypoxic EVs.** **A.** Heat maps visually display differentially expressed genes ( $|FC| > 1.5$ ). **B.** The expression of miR-6084 was validated using RT-qPCR in SW620 and derived EVs. **C.** The expression of miR-6084 was validated using RT-qPCR in SW480 and derived EVs. U6 was used as internal control. Each experiment was conducted at least 3 times. Data was presented as mean  $\pm$  standard deviation (SD). Statistical significance was assessed with 1-way ANOVA with Tukey's multiple-

comparison test (**B-C**), \*  $P < 0.05$ , \*\*  $P < 0.01$ , \*\*\*\*  $P < 0.0001$ .

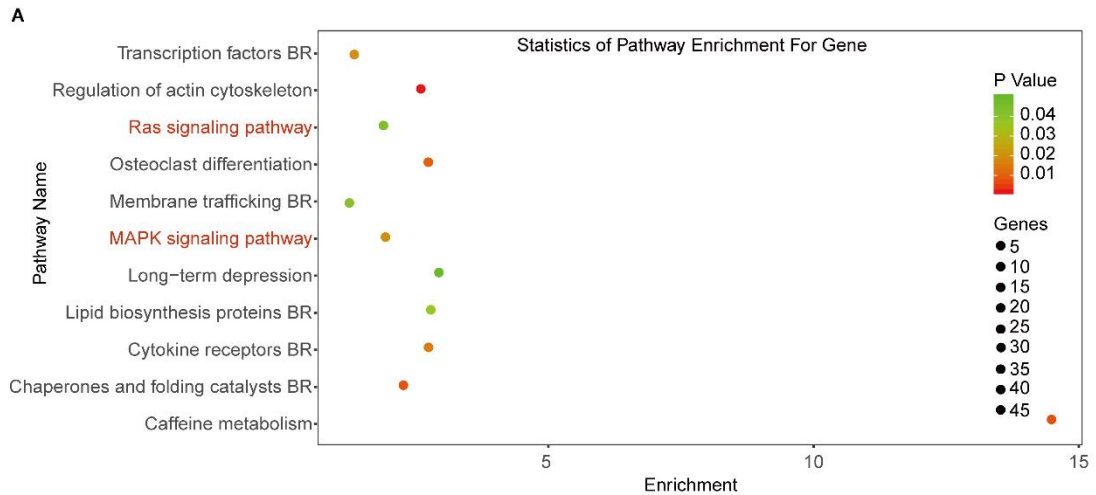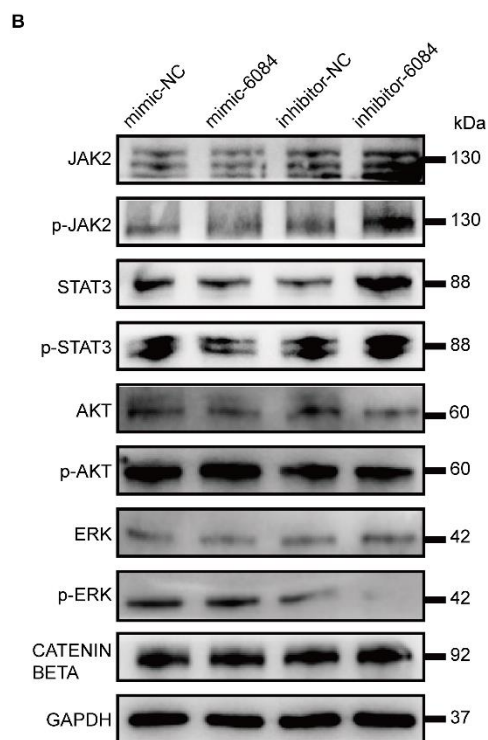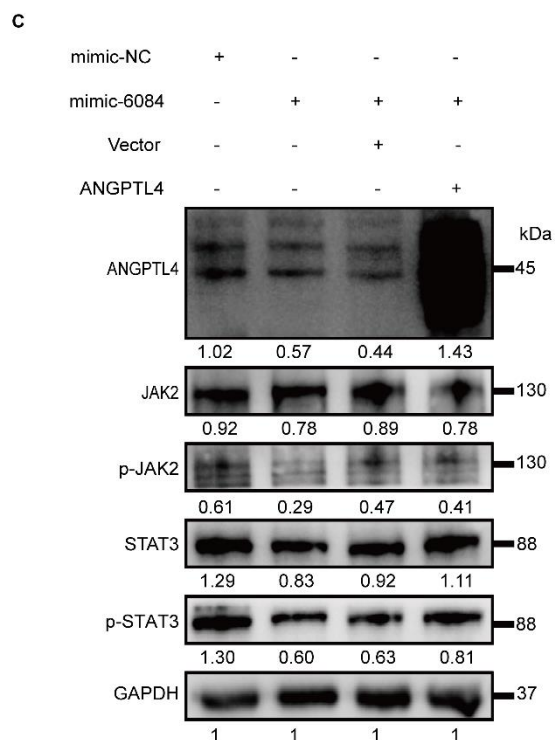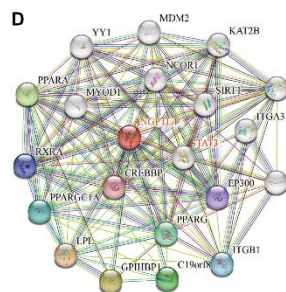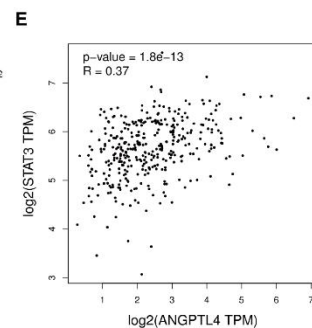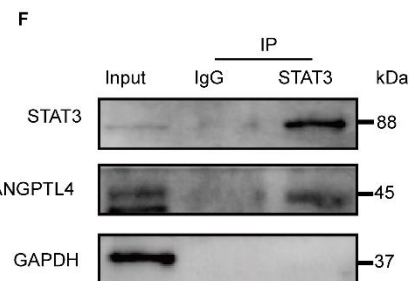

**Supplementary Figure 4. MiR-6084 inhibits angiogenesis through ANGPTL4 mediating JAK2/STAT3 pathway. A.** The KEGG pathway enrichment analysis of the

regulated genes of miR-6084. **B.** Key proteins of several common pathways (JAK2/STAT3, PI3K/AKT, RAS/Rf/ERK/MAPK, Wnt/CATENIN BETA) were detected by Western blot. **C.** ANGPTL4 can rescue the inhibited JAK2/STAT3 pathway. **D.** The protein-protein interaction (PPI) network was conducted by STRING (<https://string-db.org>). **E.** The expression correlation of ANGPTL4 and STAT3 was performed by GEPIA2. **F.** Immunoprecipitation experiments were performed to confirmed the interaction between ANGPTL4 and STAT3.

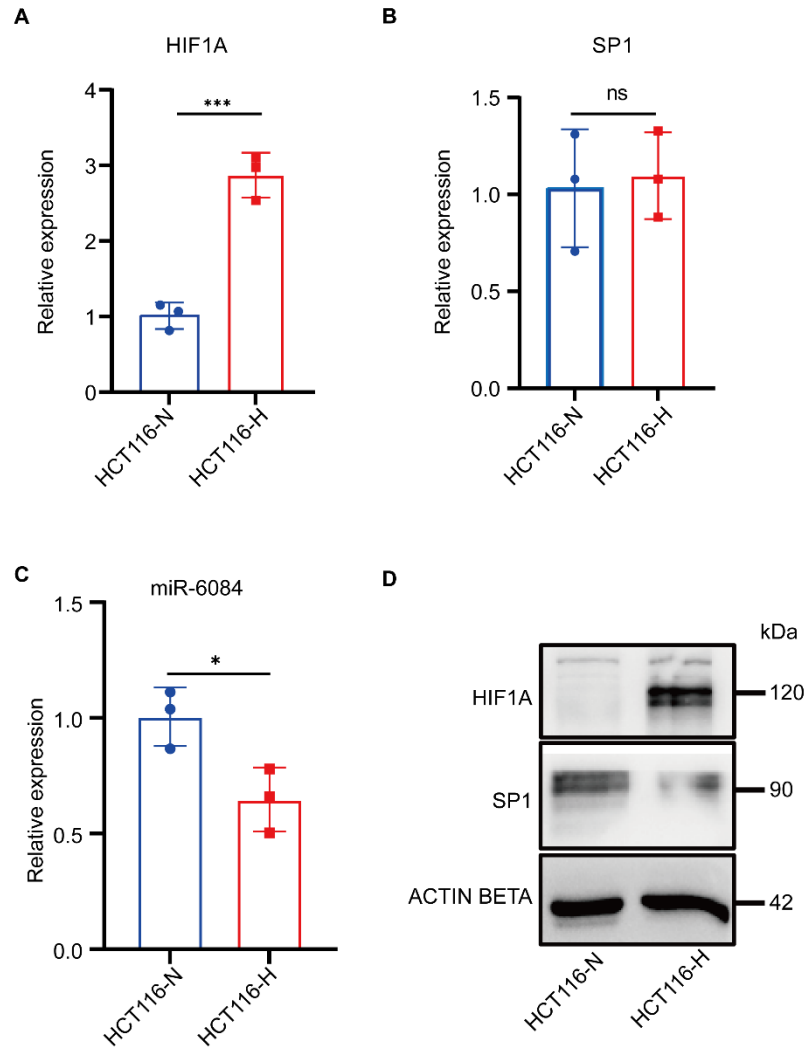

**Supplementary Figure 5. QPCR and western blot were conducted to reveal the mutual regulatory relationship between HIF1A and SP1 in HCT116 cell line. A.** Expression level of *HIF1A* mRNA in HCT116 under normoxic or hypoxic condition detected by qPCR. **B.** Expression level of *SP1* mRNA in HCT116 under normoxic or hypoxic condition detected by qPCR. **C.** Expression level of miR-6084 in HCT116 under normoxic or hypoxic condition detected by qPCR. **D.** Expression level of HIF1A and SP1 protein in HCT116 under normoxic or hypoxic condition detected by western blot. Statistical significance was assessed with 2-tailed unpaired Student's *t* test (**A-C**), ns represents no significant difference, \*  $P < 0.05$ , \*\*\*  $P < 0.001$ .

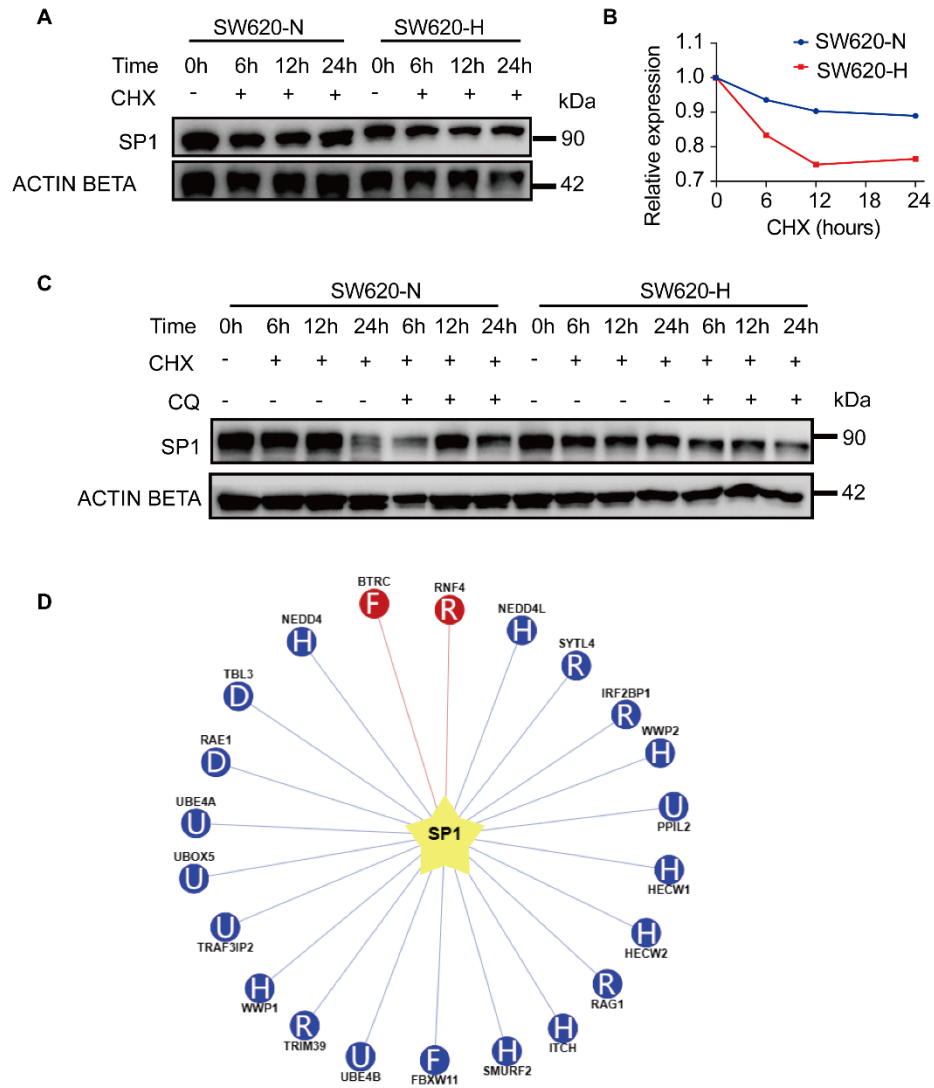

**Supplementary Figure 6. HIF1A modulates miR-6084 expression by regulating SP1 protein ubiquitination and proteasomal degradation.** **A.** SW620 cells were treated by CHX (a protein synthesis inhibitor), then SP1 protein stability was measured by western blot. **B.** Half-life curves were drawn according to panel A. **C.** SW620 cells were treated by CHX (a protein synthesis inhibitor) and CQ (chloroquine, an autophagy inhibitor), then SP1 protein stability was measured by western blot. **D.** Predicted E3 ubiquitin ligase of SP1 in UbiBrowser, an integrated bioinformatics platform (<http://ubibrowser.ncpsb.org>).

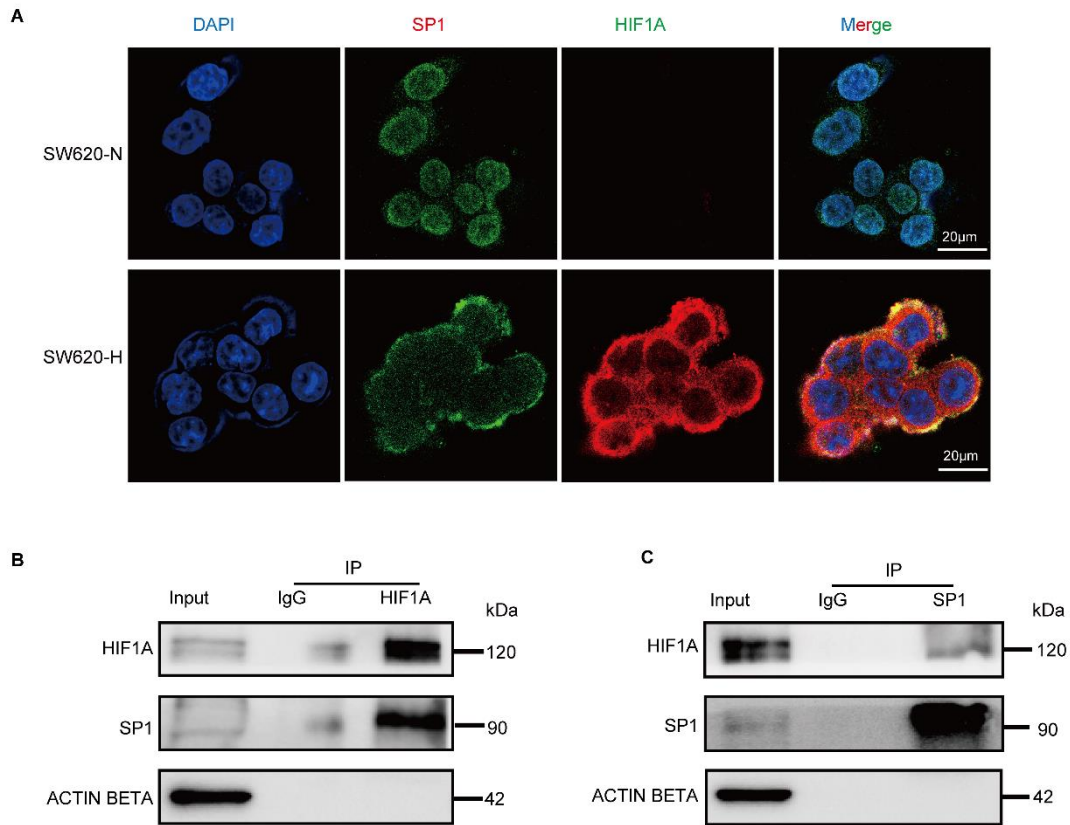

**Supplementary Figure 7. HIF1A modulates miR-6084 expression by sequestering SP1 from the miR-6084 promoter.** **A.** Representative images of immunofluorescence revealing the colocalization of SP1 and HIF1A. **B-C.** Co-immunoprecipitation assays were conducted to confirm the binding between SP1 and HIF1A.

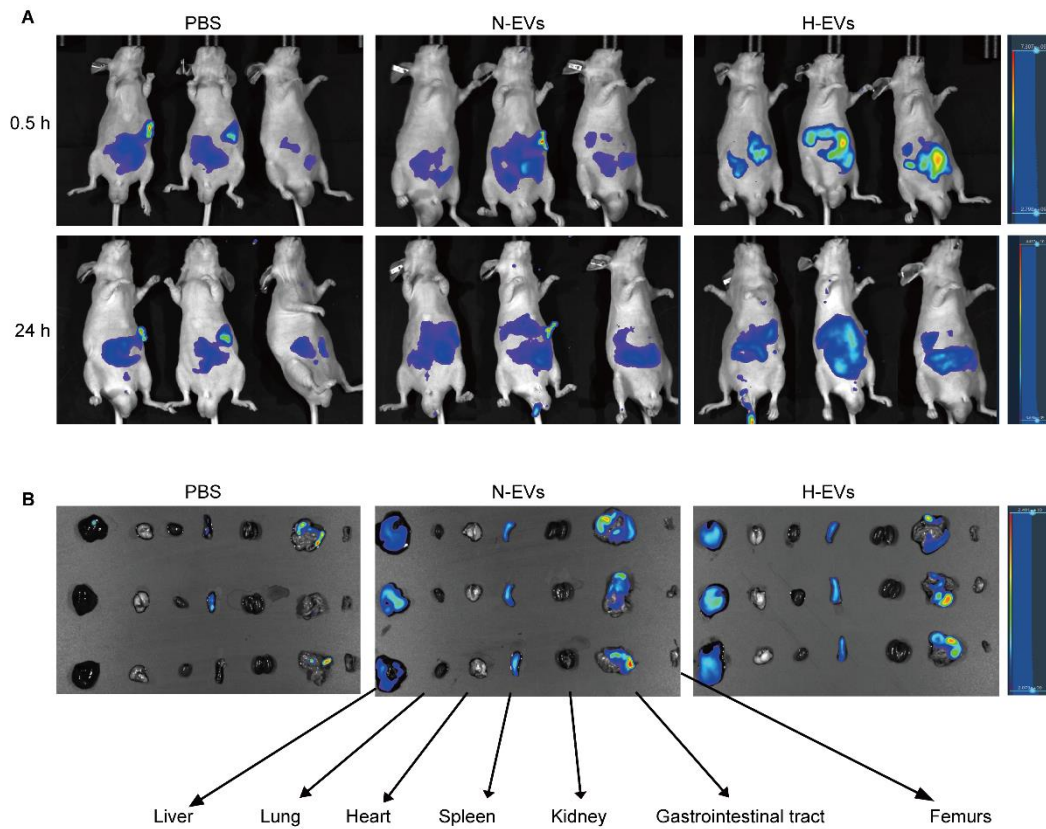

**Supplementary Figure 8. Uptake of normoxic or hypoxic SW620 derived EVs by nude mice. A.** DID+ EVs were injected through the tail vein for 30min and 24 hours. Then the distribution of EVs was observed by in vivo imaging. **B.** Mice were sacrificed and their liver, lungs, heart, spleen, kidneys, gastrointestinal tract and femurs (from left to right) were imaged in vitro.

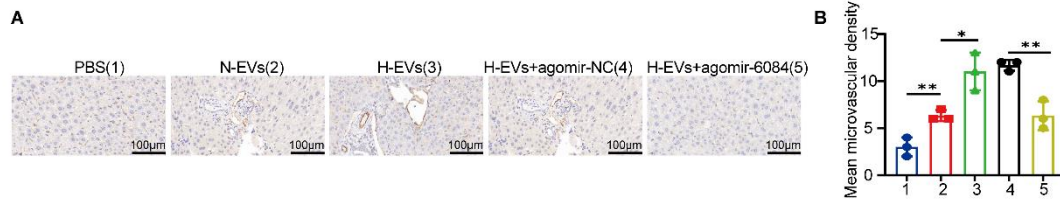

**Supplementary Figure 9. CRC-derived H-EVs promote angiogenesis and liver metastasis through EV miR-6084 in vivo.** **A.** Immunohistochemistry staining (IHC) for CD31 of liver tissues in each group. **B.** Microvascular density was counted. Each experiment was conducted at least 3 times. Data was presented as mean  $\pm$  standard deviation (SD). Statistical significance was assessed with 1-way ANOVA with Tukey's multiple-comparison test (**B**), \*  $P < 0.05$ , \*\*  $P < 0.01$ .

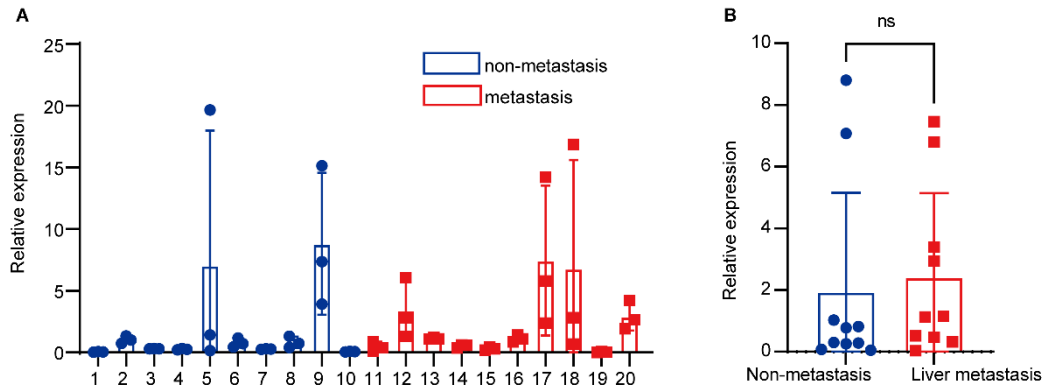

**Supplementary Figure 10. Plasma miR-6084 is comparable between CRC patients with or without liver metastasis.** **A.** Levels of miR-6084 in the plasma of CRC patients with or without liver metastasis detected by qPCR. **B.** Unpaired t-test was performed between non-metastasis group and liver metastasis group. Statistical significance was assessed with 2-tailed unpaired Student's *t* test (**B**), ns represents no significant difference.

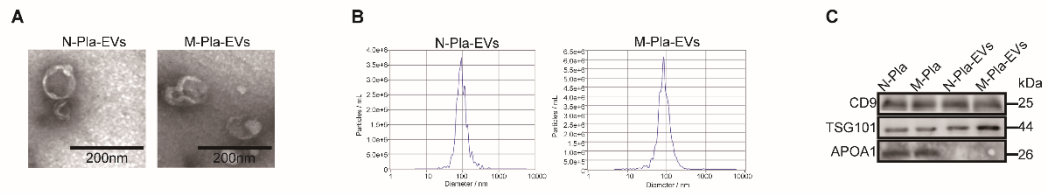

**Supplementary Figure 11. The characterization of plasma-derived EVs.** A. Transmission electron microscope (TEM) images of EVs. B. The representative nanoparticle tracking analysis (NTA) of EVs. C. The EV positive (CD9 and TSG101) and negative (APOA1) markers were analyzed by western blot. N, non-metastasis; M, liver metastasis.

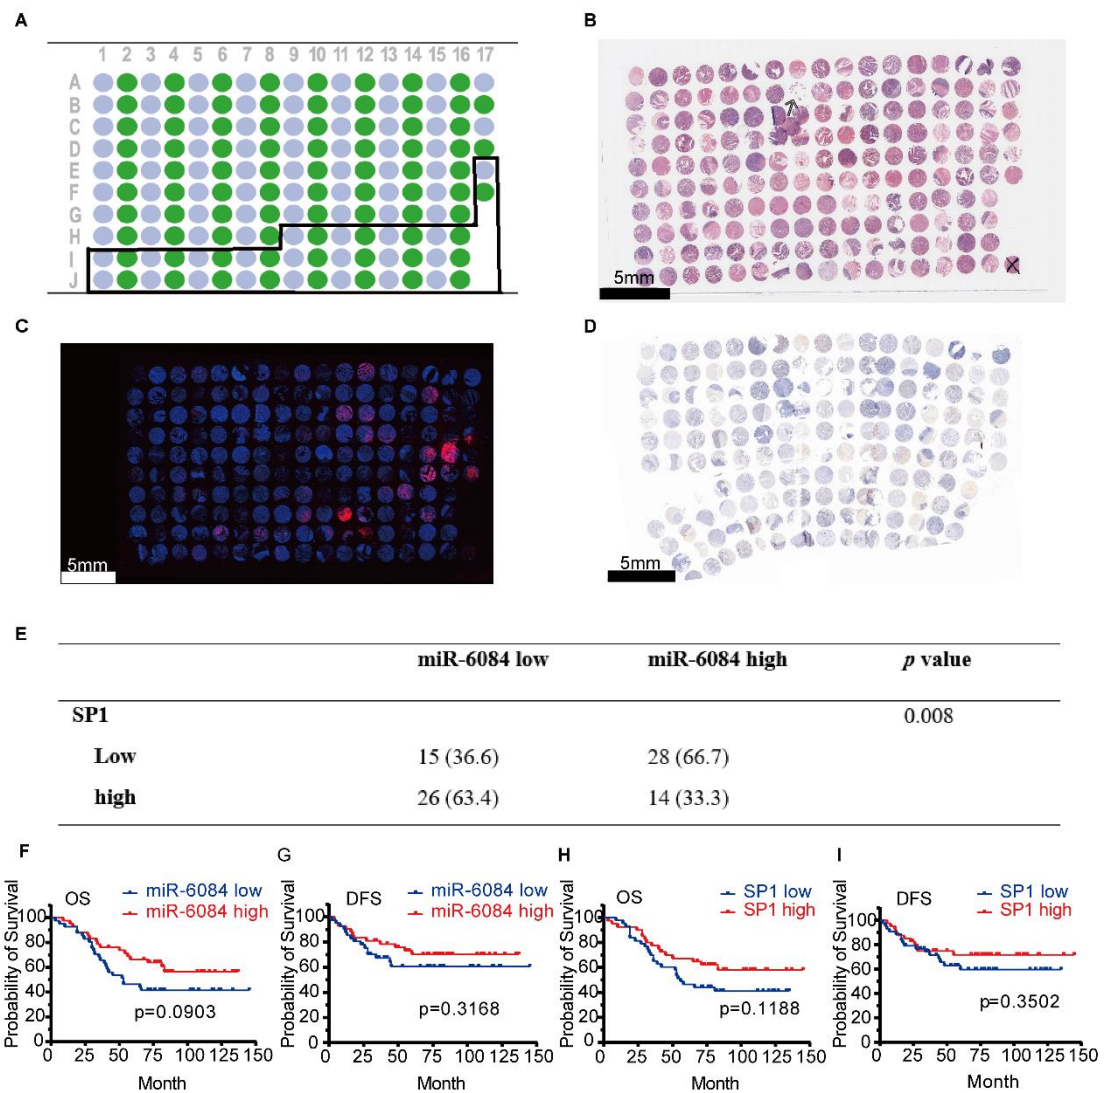

**Supplementary Figure 12. The complete information of CRC tissue chips. A.** The schematic diagram of each point in the tissue chips (the blue spots refer to cancerous tissues, the green spots refer to adjacent tissues and spots in black bar box refer to patients with liver metastasis). **B.** The complete image of H.E staining in the tissue chips. **C.** The whole image of miR-6084 ISH in CRC tissue chips. **D.** The complete image of SP1 IHC in the CRC tissue chips. **E.** Chi-square test was performed to analyze correlation between miR-6084 and SP1. **F.** Overall survival curves of CRC patients with miR-6084 low/high expression. **G.** Disease-free survival curves of CRC patients with miR-6084 low/high expression. **H.** Overall survival curves of CRC patients with SP1 low/high expression. **I.** Disease-free survival curves of CRC patients with SP1 low/high

expression. Estimation of the relationship between miR-6084/SP1 expression and OS/DFS times in CRC patients was performed by Kaplan-Meier analysis, *P* value was calculated with log-rank test.

**Supplementary Table 1. The detailed information of these 16 differently expressed miRNAs**

| Hyposxia | Normaxia | FC            | Regulation | P.Value   | Accession    | Transcript.ID.Array.Design. | Chromosome | Start     | Stop      | Strand | Length | Sequence                |
|----------|----------|---------------|------------|-----------|--------------|-----------------------------|------------|-----------|-----------|--------|--------|-------------------------|
| 2.13     | 3.07     | <b>-1.919</b> | down       | 0.0086492 | MIMAT0005951 | <b>hsa-miR-1307-3p</b>      | chr10      | 105154058 | 105154079 | -      | 22     | ACUCGGCGUGGCGUCGGUCGUG  |
| 0.27     | 1.16     | <b>-1.853</b> | down       | 0.0064324 | MIMAT0018352 | <b>hsa-miR-3937</b>         | chrX       | 39520530  | 39520552  | +      | 23     | ACAGGCGGCGUAGCAAUGGGGG  |
| 0.21     | 1.06     | <b>-1.803</b> | down       | 0.0333304 | MIMAT0023709 | <b>hsa-miR-6084</b>         | chr1       | 20960249  | 20960268  | +      | 20     | UUCGCCACUGCGGUGGCCGG    |
| 0.51     | 1.33     | <b>-1.765</b> | down       | 0.0353055 | MIMAT0019855 | <b>hsa-miR-4732-5p</b>      | chr17      | 27188718  | 27188740  | -      | 23     | UGUAGAGCAGGGAGCAGGAAGCU |
| 1.62     | 2.44     | <b>-1.765</b> | down       | 0.0389673 | MIMAT0027418 | <b>hsa-miR-6759-5p</b>      | chr12      | 58142439  | 58142460  | -      | 22     | UUGUGGGUGGGCAGAAGUCUGU  |
| 0.22     | 1.03     | <b>-1.753</b> | down       | 0.0049175 | MIMAT0003221 | <b>hsa-miR-557</b>          | chr1       | 168344822 | 168344844 | +      | 23     | GUUUGCACGGGUGGGCCUUGUCU |
| -0.01    | 0.79     | <b>-1.741</b> | down       | 0.008153  | MIMAT0027674 | <b>hsa-miR-6887-5p</b>      | chr19      | 35613609  | 35613631  | +      | 23     | UGGGGGACAGAUGGAGAGGACA  |
| 2.51     | 3.27     | <b>-1.693</b> | down       | 0.0163286 | MIMAT0007349 | <b>hsa-miR-1471</b>         | chr2       | 232756987 | 232757008 | -      | 22     | GCCCCGUGUGGAGCCAGGUGU   |
| 0.32     | 1.01     | <b>-1.613</b> | down       | 0.0042973 | MIMAT0018005 | <b>hsa-miR-3622b-5p</b>     | chr8       | 27559243  | 27559262  | -      | 20     | AGGCAUGGGAGGUCAGGUGA    |
| 0.45     | 1.13     | <b>-1.602</b> | down       | 0.0102543 | MIMAT0014996 | <b>hsa-miR-3131</b>         | chr2       | 219923447 | 219923469 | -      | 23     | UCGAGGACUGGUGGAAGGGCCUU |
| 0.27     | 0.94     | <b>-1.591</b> | down       | 0.0040383 | MIMAT0003237 | <b>hsa-miR-572</b>          | chr4       | 11370511  | 11370530  | +      | 20     | GUCCGCUCGCGGUGGCCCA     |
| 0.39     | 1.05     | <b>-1.58</b>  | down       | 0.0486953 | MIMAT0025458 | <b>hsa-miR-6501-5p</b>      | chr21      | 34922970  | 34922991  | +      | 22     | AGUUGCCAGGGCUGCCUUUGGU  |
| 0.22     | 0.83     | <b>-1.526</b> | down       | 0.0260276 | MIMAT0023700 | <b>hsa-miR-6075</b>         | chr5       | 1510882   | 1510902   | -      | 21     | ACGGCCCAGGCGCAUUGGUG    |
| 2.49     | 1.79     | <b>1.625</b>  | up         | 0.0115106 | MIMAT0027456 | <b>hsa-miR-6778-5p</b>      | chr17      | 18244174  | 18244195  | -      | 22     | AGUGGGAGGACAGGAGGCAGGU  |
| 2.79     | 1.53     | <b>2.395</b>  | up         | 0.0465264 | MIMAT0016924 | <b>hsa-miR-4330</b>         | chrX       | 150336770 | 150336788 | +      | 19     | CCUCAGAUCAGAGCCUUGC     |
| 2.04     | 0.51     | <b>2.888</b>  | up         | 0.0005327 | MIMAT0019735 | <b>hsa-miR-4663</b>         | chr8       | 124228071 | 124228094 | -      | 24     | AGCUGAGCUCCAUGGACGUCAGU |



**Supplementary Table 3. List of primary antibodies used in this study.**

| Antibody              | Company     | Catalog    | Experiment          | Dilution |
|-----------------------|-------------|------------|---------------------|----------|
| CD9                   | Abcam       | ab236630   | Western Blot        | 1:1000   |
| TSG101                | Abcam       | ab125011   | Western Blot        | 1:1000   |
| GRP94                 | Abcam       | ab238126   | Western Blot        | 1:1000   |
| Calnexin              | Abcam       | ab22595    | Western Blot        | 1:1000   |
| HIF1A                 | Proteintech | 20960-1-AP | Western Blot        | 1:1000   |
| HIF1A                 | Proteintech | 20960-1-AP | Immunoprecipitation | 1:300    |
| HIF1A                 | CST         | 79233T     | Immunofluorescence  | 1:200    |
| ACTIN BETA            | Proteintech | 66009-1-Ig | Western Blot        | 1:1000   |
| JAK2                  | Abcam       | ab108596   | Western Blot        | 1:1000   |
| p-JAK2                | Abcam       | ab32101    | Western Blot        | 1:1000   |
| STAT3                 | Abcam       | ab68153    | Western Blot        | 1:1000   |
| p-STAT3               | Abcam       | ab267373   | Western Blot        | 1:1000   |
| AKT                   | Abcam       | ab8808     | Western Blot        | 1:1000   |
| p-AKT                 | Abcam       | ab38449    | Western Blot        | 1:1000   |
| ERK                   | HUABIO      | ET1601-29  | Western Blot        | 1:1000   |
| p-ERK                 | HUABIO      | ET1610-13  | Western Blot        | 1:1000   |
| GAPDH                 | Proteintech | 60004-1-Ig | Western Blot        | 1:1000   |
| ANGPTL4               | Proteintech | 18374-1-AP | Western Blot        | 1:1000   |
| SP1                   | Proteintech | 21962-1-AP | Western Blot        | 1:1000   |
| SP1                   | Proteintech | 21962-1-AP | Immunoprecipitation | 1:300    |
| SP1                   | Proteintech | 21962-1-AP | Immunofluorescence  | 1:50     |
| SP1                   | Proteintech | 21962-1-AP | IHC                 | 1:300    |
| SP1                   | CST         | 9389S      | CHIP                | 1:100    |
| p-SP1 <sup>T453</sup> | Affinity    | AF3121     | Western Blot        | 1:1000   |

---

|                       |             |            |              |        |
|-----------------------|-------------|------------|--------------|--------|
| p-SP1 <sup>T739</sup> | Affinity    | AF3122     | Western Blot | 1:1000 |
| CD31                  | Proteintech | 28083-1-AP | IHC          | 1:8000 |
| APO1                  | Proteintech | 14427-1-AP | Western Blot | 1:1000 |
| BTRC                  | CST         | 4394T      | Western Blot | 1:1000 |
| Ubiquitin             | CST         | 20326T     | Western Blot | 1:1000 |

---

**Supplementary Table 4. The primers for RT-qPCR.**

| Primer name   | Sequence                       |
|---------------|--------------------------------|
| miR-4663--F   | 5'-AGCTGAGCTCCATGGACGTGCAGT-3' |
| miR-6084-F    | 5'-TTCCGCCAGTCGGTGGCCGG-3'     |
| miR-6759-5p-F | 5'-TTGTGGGTGGGCAGAAGTCTGT-3'   |
| miR-6887-5p-F | 5'-TGGGGGGACAGATGGAGAGGACA-3'  |
| ANGPTL-F      | 5'-GTCCACCGACCTCCCGTTA-3'      |
| ANGPTL-R      | 5'-CCTCATGGTCTAGGTGCTTGT-3'    |
| SP1-F         | 5'-TGGCAGCAGTACCAATGGC-3'      |
| SP1-R         | 5'-CCAGGTAGTCCTGTCAGAACTT-3'   |
| HIF1A-F       | 5'- GAACGTCGAAAAGAAAAGTCTCG-3' |
| HIF1A-R       | 5'- CCTTATCAAGATGCGAACTCACA-3' |
| GAPDH-F       | 5'-AATGGGCAGCCGTTAGGAAA-3'     |
| GAPDH-R       | 5'-GCGCCCAATACGACCAAATC-3'     |
| U6-F          | 5'-CTCGCTTCGGCAGCACA-3'        |
| U6-R          | 5'-AACGCTTCACGAATTTGCGT-3'     |

**Supplementary Table 5. The primers for CHIP RT-qPCR**

| Primer name         | Sequence                     |
|---------------------|------------------------------|
| miR-6084-promoter F | 5'- CGTGGGTCCAAAGTGCAAAG -3' |
| miR-6084-promoter R | 5'- AGCAGCAGCGCTCGAC -3'     |

**Supplementary Table 6. The baseline characters of patients included.**

|                        | CRC patients without distant metastasis(n=10) | CRC patients with liver metastasis (n=10) | P     |
|------------------------|-----------------------------------------------|-------------------------------------------|-------|
| Gender, male/female    | 7/3                                           | 5/5                                       | 0.625 |
| Age, years             | 59.0 ± 4.4                                    | 59.7 ± 3.6                                | 0.903 |
| BMI, Kg/m <sup>2</sup> | 22.3 ± 3.0                                    | 22.2 ± 3.1                                | 0.980 |
| AFP, ng/mL             | 3.4 ± 2.1                                     | 2.6 ± 0.8                                 | 0.268 |
| CEA, ng/mL             | 5.7 ± 5.5                                     | 18.4 ± 27.6                               | 0.171 |
| CA199, U/mL            | 173.1 ± 354.6                                 | 12.0 ± 9.0                                | 0.168 |
| CA125, U/mL            | 72.8 ± 177.0                                  | 17.5 ± 13.1                               | 0.337 |
| cT                     |                                               |                                           | 0.638 |
| 2                      | 1                                             | 1                                         |       |
| 3                      | 5                                             | 3                                         |       |
| 4                      | 4                                             | 6                                         |       |
| cN                     |                                               |                                           | 0.069 |
| 0                      | 5                                             | 1                                         |       |
| 1                      | 1                                             | 5                                         |       |
| 2                      | 4                                             | 4                                         |       |

BMI, Body mass index; AFP, Alpha-fetoprotein; CEA, carcinoembryonic antigen; CA199, carbohydrate antigen 199; CA125, carbohydrate antigen 125; Quantitative data is represented by mean ± standard deviation, while categorical data is represented by number of examples
